# Supplementary material for: Differing Dynamics of Intrapersonal and Interpersonal Coordination: Two-finger and Four-Finger Tapping Experiments
Source: PLoS One. 2015 Jun 12;10(6):e0129358. doi: 10.1371/journal.pone.0129358 (PMC4466560; doi:10.1371/journal.pone.0129358)
Supplement: S1 Dataset — (XLSX) [file pone.0129358.s001.xlsx]

## Sheet: Dataset_Exp1
Dataset of Experiment 1
* abbreviation				% Phase Transition Occurrence		Condition
Exp	experiment			Fig. 4		2f_in	2f_an	4f_in	4f_an
SD	standard deviation				s.01	0	0	0	100
					s.02	0	0	0	100
Condition					s.03	0	0	0	100
2f-in	two-finger, in-phase				s.04	0	0	0	100
2f-an	two-finger, anti-phase				s.05	0	0	0	100
4f-in	four-finger, in-phase				s.06	0	0	0	100
4f-an	four-finger, anti-phase				s.07	0	0	0	100
					s.08	0	0	0	75
Frequency		mean			s.09	0	0	0	100
f1	0-5 sec.	1.06 Hz			s.10	0	0	0	100
f2	5-10 sec.	1.23 Hz
f3	10-15 sec.	1.50 Hz
f4	15-20 sec.	1.93 Hz		SDφ [degree]		2f												4f
f5	20-25 sec.	2.55 Hz		Fig. 5		in						an						in						an
f6	25-30 sec.	2.96 Hz				f1	f2	f3	f4	f5	f6	f1	f2	f3	f4	f5	f6	f1	f2	f3	f4	f5	f6	f1	f2	f3	f4	f5	f6
					s.01	9.09995	6.11686	7.59193	9.08129	19.1162	34.6631	11.8607	14.377	12.6333	18.1848	13.8591	22.2413	10.964	11.0815	11.6478	9.35314	17.721	23.5345	12.2938	11.4152	15.4367	47.0418	79.8458	19.7659
Subject #					s.02	4.81381	9.92821	8.63362	12.6885	27.0374	24.1788	12.7538	5.26003	14.114	9.15048	16.4038	16.1293	7.18077	13.6563	17.5124	20.4529	21.0595	32.0741	7.72299	26.605	17.9088	23.28	41.9816	17.2209
s.01	subjects in Exp.1				s.03	4.48083	5.69375	8.2697	9.84522	14.482	18.9856	6.07657	6.61592	7.30132	9.2392	13.446	11.7582	4.42381	6.7929	8.93651	7.98337	13.6954	11.6556	6.20576	9.06053	7.78535	25.0666	51.2455	11.0778
s.02	subjects in Exp.1				s.04	5.22082	7.32989	6.94054	13.778	24.0728	28.2285	5.32761	8.04058	9.6565	11.4546	10.8926	16.0912	8.26231	6.83716	9.41018	10.1521	16.3919	26.71	3.55021	5.90173	8.90758	76.7663	14.3661	46.3318
s.03	subjects in Exp.1				s.05	3.50357	5.41806	6.33751	8.36273	11.1313	20.255	5.40447	8.92016	10.2799	10.6035	17.3813	18.027	5.28259	6.61608	6.36071	8.00708	11.5733	37.0804	4.9603	21.7311	41.3648	32.1851	36.7114	51.9524
s.04	subjects in Exp.1				s.06	4.98257	4.43495	6.88554	9.67353	14.9539	19.6836	6.7813	5.30938	6.29347	9.92019	16.3665	15.2871	5.3943	5.78076	5.27165	9.39671	18.7489	26.1273	6.35336	7.72866	10.1411	40.0028	36.6294	25.7616
s.05	subjects in Exp.1				s.07	6.46908	8.7678	9.51313	16.617	27.6115	31.3435	6.79608	8.70796	10.7931	12.7569	13.6336	17.347	4.62874	9.54841	10.0293	15.5166	26.44	35.982	24.7726	29.2389	45.7461	14.3163	73.6187	66.022
s.06	subjects in Exp.1				s.08	5.21077	6.97213	7.38693	8.6296	11.281	16.0182	9.96531	12.2618	10.1506	8.22058	13.1138	23.7901	5.74	5.09561	4.20713	7.10386	7.99567	10.4902	6.57595	10.7831	13.3368	28.0793	39.0851	24.5215
s.07	subjects in Exp.1				s.09	3.92818	6.69391	6.67245	9.86633	10.7855	12.4598	5.05685	9.44252	7.2499	12.5779	17.9721	16.4583	4.72744	6.81138	5.57402	10.3411	18.1983	22.0163	8.99947	9.26731	10.3062	82.8223	22.3943	90.2976
s.08	subjects in Exp.1				s.10	5.2536	10.4418	11.5275	17.9936	15.9736	19.776	10.2426	8.83318	9.60804	14.1718	14.1025	15.9826	3.74738	7.30302	8.36422	16.7613	21.1118	29.8046	7.09334	32.1169	10.2676	61.8428	28.1089	18.5189
s.09	subjects in Exp.1
s.10	subjects in Exp.1
				Average Relativ Phase [degree]		2f												4f
				Fig. 8		in						an						in						an
						f1	f2	f3	f4	f5	f6	f1	f2	f3	f4	f5	f6	f1	f2	f3	f4	f5	f6	f1	f2	f3	f4	f5	f6
					s.01	5.9966	1.84713	5.38607	4.49923	10.0676	11.7677	170.847	170.182	176.182	168.989	157.994	154.112	4.17074	3.55024	3.09881	3.8869	8.38273	18.6019	170.054	169.849	173.017	148.918	86.5792	15.338
					s.02	5.74143	5.11068	9.67322	14.0477	15.2596	26.3418	174.271	173.813	173.053	170.353	173.356	160.227	7.61024	2.9194	3.93089	4.65947	9.83202	20.4054	178.431	144.649	125.618	99.7774	65.4773	23.1159
					s.03	3.02435	3.1332	4.81411	6.00512	6.52069	10.7007	176.832	177.646	178.179	174.75	164.469	161.764	4.64618	2.62381	3.65101	2.2583	3.80479	2.1677	176.053	178.008	176.861	176.143	37.76	11.3369
					s.04	4.0556	3.67975	2.05382	3.0917	1.08396	2.91037	174.332	174.528	176.482	177.645	171.541	166.549	5.60846	8.01109	8.8757	5.88064	9.73975	27.2526	171.259	171.265	173.973	111.024	17.769	63.3802
					s.05	1.09485	3.9631	4.03006	7.32877	12.012	10.4188	172.71	172.972	172.874	175.892	152.809	126.36	2.95102	3.11141	5.21166	4.39668	11.6633	24.9121	132.343	120.628	91.6183	44.7741	25.6014	57.9564
					s.06	6.02392	4.41853	7.56191	5.86884	7.27561	3.813	177.227	177.322	177.679	173.257	176.896	177.938	2.32737	3.52863	2.70118	8.64699	12.9117	35.7444	172.773	172.344	173.171	130.17	48.7101	49.0813
					s.07	3.47188	6.52208	6.03818	4.1963	7.35081	5.14877	171.622	175.018	175.554	175.777	175.412	170.051	2.56594	8.01958	6.22552	5.93019	5.44728	27.4862	170.636	107.014	51.9214	11.8748	76.1242	67.0569
					s.08	1.26755	2.97612	3.39295	3.46845	1.6787	3.55269	166.891	169.624	167.41	169.909	177.35	174.468	2.43833	1.89659	2.86852	2.43447	5.28618	5.21966	158.086	173.038	154.719	130.752	105.551	55.059
					s.09	4.43369	6.90491	5.06155	6.98739	5.40774	2.63355	175.272	175.502	173.01	175.343	167.248	163.766	5.4382	3.32225	5.87973	4.54033	3.16991	12.0427	175.769	170.627	172.212	82.9778	19.7777	86.2503
					s.10	4.51295	8.10338	12.3868	10.0148	12.5349	15.2055	169.977	172.991	174.237	168.789	160.501	160.38	1.8702	3.02352	4.51545	10.9128	24.6314	28.8436	169.521	160.888	169.784	94.4837	30.4331	23.6226
				% Recurrence		2f												4f
				Fig. 6		in						an						in						an
						f1	f2	f3	f4	f5	f6	f1	f2	f3	f4	f5	f6	f1	f2	f3	f4	f5	f6	f1	f2	f3	f4	f5	f6
					s.01	6.49229	7.98916	7.25336	4.96114	4.27112	4.78579	6.58392	6.2876	6.14725	4.16824	5.96227	4.48628	6.26092	4.78881	5.01115	4.83385	4.88862	3.42612	3.87875	4.42255	3.89773	4.21208	2.15649	3.59174
					s.02	6.6793	6.47172	4.5025	5.03514	3.94432	5.2443	5.71796	5.90134	5.16893	5.27372	4.76307	7.32688	6.93908	5.0269	4.73433	4.61081	3.94058	3.47207	5.58612	4.85389	4.2945	4.22576	3.57021	3.77388
					s.03	9.35152	8.37923	6.64629	6.02582	5.52689	6.09355	7.41899	7.00267	7.09881	6.91621	6.08141	6.71339	8.58724	7.39115	5.85967	5.82699	5.55752	7.1805	6.87819	7.19631	4.89004	3.74567	4.30618	5.28926
					s.04	4.77926	4.38406	5.13341	6.73772	5.52212	5.33091	7.17284	5.98641	5.97424	6.2671	5.23413	6.77884	7.73524	6.02292	5.00384	5.17682	4.25954	3.88364	7.16331	7.4852	5.25067	4.09565	4.21427	3.4962
					s.05	9.26947	9.4189	7.45367	4.81351	5.33149	6.27537	5.52895	7.75821	6.16724	5.97953	4.65203	4.76893	8.45329	5.67451	6.37063	5.79718	4.03521	2.79504	3.84893	6.1995	3.10227	4.6564	3.66757	1.99603
					s.06	3.95002	4.57334	2.91042	4.70479	4.38822	5.81884	7.62307	6.52093	6.45329	5.08108	4.66531	6.58215	2.56483	2.83011	3.34679	3.8884	3.48171	2.96595	2.01307	2.92535	1.95079	2.75498	3.01432	3.31405
					s.07	6.83507	6.89275	4.37024	4.19209	2.70455	3.17223	8.1262	6.45426	5.40369	5.27045	5.47446	5.2486	8.66577	6.07094	4.55632	3.87647	2.39069	1.92331	7.21538	5.56182	4.58862	3.97397	1.93455	2.26512
					s.08	8.40691	7.77567	7.10727	6.6027	5.74407	6.7524	6.72095	7.05227	4.16763	5.31288	5.85947	4.77322	7.66427	6.14078	6.15994	5.19996	5.99903	5.03934	4.34149	5.0273	2.40177	2.91805	2.93195	5.17785
					s.09	8.4848	7.54432	6.82968	5.78876	6.49092	5.23107	7.26781	6.56934	8.69742	5.44719	4.76301	4.20727	7.93973	7.0479	7.65206	4.32746	2.63273	5.52264	6.73206	5.96022	6.18339	3.44583	2.67187	4.94645
					s.10	9.33278	10.3308	8.22568	6.27762	6.94946	8.24231	7.61808	8.43122	7.39677	6.23483	5.2743	6.89884	9.05713	9.24906	7.65321	5.45421	4.62004	4.08992	5.8494	6.0626	6.58554	2.81214	2.90369	2.56992
				Average Line		2f												4f
				Fig. 7		in						an						in						an
						f1	f2	f3	f4	f5	f6	f1	f2	f3	f4	f5	f6	f1	f2	f3	f4	f5	f6	f1	f2	f3	f4	f5	f6
					s.01	7.02727	5.78857	5.83997	6.98656	6.08895	8.32547	6.59432	6.85753	7.29562	5.09251	5.74921	7.63146	7.51773	7.12678	7.06956	7.15729	6.6184	5.91195	5.31695	6.08387	5.8018	6.42913	4.82692	7.50972
					s.02	6.81279	6.67007	6.57777	7.25864	7.75436	10.8298	7.78168	6.51171	7.48873	8.47328	8.21359	15.1224	5.71523	6.43195	6.14588	7.4853	5.9614	5.79861	5.33704	5.91385	5.59466	5.82015	4.96789	6.50958
					s.03	7.63489	7.92239	8.63266	8.96086	8.07807	14.5151	7.80798	6.66019	8.23845	9.14934	8.91062	12.2726	6.97976	7.66627	7.71995	8.62647	7.20778	10.4688	6.07556	6.78081	6.94214	6.59105	6.42203	8.07506
					s.04	5.61681	4.77673	6.71569	7.88092	8.19065	10.6854	5.9439	6.10387	6.83036	8.99341	7.07997	10.8431	6.96081	6.32579	6.34856	7.226	6.92882	7.22463	6.33172	7.50377	6.4431	7.48518	7.06071	7.0115
					s.05	7.56105	6.27374	7.464	7.51977	7.66115	10.9107	6.06877	6.58994	5.46524	6.86985	8.01417	10.7815	6.88071	7.21226	7.61309	8.50193	7.00013	7.24315	5.3382	5.74676	5.58114	6.57543	6.03136	5.72162
					s.06	4.9709	5.02103	4.51532	7.48879	7.4728	11.4799	7.27337	6.91459	7.381	8.02384	6.8221	8.89295	6.21229	4.10762	5.23157	5.95476	6.37233	6.2971	5.55258	4.01562	4.56888	4.97428	4.93616	5.56903
					s.07	7.65786	5.53467	6.01791	5.61721	5.12088	6.91047	6.86782	6.25968	6.29263	7.58476	7.37246	8.94328	7.5445	6.77623	5.87262	6.2186	5.28145	4.93301	6.2918	5.60331	5.76808	5.6896	4.12465	5.26076
					s.08	7.23908	7.54978	6.12112	6.15575	6.98762	11.3152	5.42785	6.54974	5.44598	6.25099	5.89911	7.5827	6.73667	7.50532	7.21723	6.75379	6.80214	7.99947	4.27366	5.56759	3.06109	3.55817	4.27957	8.02961
					s.09	7.65352	8.00534	5.42705	5.9267	6.32572	9.46196	7.96283	7.62766	4.74668	5.30558	6.56579	8.13937	7.3197	7.69725	5.1767	5.88955	4.1301	5.93137	6.73021	7.094	4.29773	4.58406	3.95226	6.0362
					s.10	7.46179	6.8613	6.81294	8.11907	11.6529	17.4146	6.8283	6.59842	6.69131	6.94761	6.01325	10.7368	6.80399	7.86333	7.4549	7.45794	6.87747	8.83819	4.7874	5.77654	6.70829	5.26831	4.34678	4.84649
				SDφ [degree]		Inedx												Middle												Left												Right
				Additional Analysis in 4f Condition		in						an						in						an						in						an						in						an
						f1	f2	f3	f4	f5	f6	f1	f2	f3	f4	f5	f6	f1	f2	f3	f4	f5	f6	f1	f2	f3	f4	f5	f6	f1	f2	f3	f4	f5	f6	f1	f2	f3	f4	f5	f6	f1	f2	f3	f4	f5	f6	f1	f2
					s.01	10.964	11.0815	11.6478	9.35314	17.721	23.5345	12.2938	11.4152	15.4367	47.0418	79.8458	19.7659	16.3442	14.6735	21.9872	21.7894	17.497	18.7515	14.5228	17.6301	20.2195	19.0212	63.8613	56.6783	13.0915	21.5549	27.3565	35.3139	29.6906	28.5549	12.8066	20.2885	21.0688	20.3496	39.2647	25.3545	14.3355	14.2489	16.2431	17.5025	18.5076	20.9889	12.8814	14.56
					s.02	7.18077	13.6563	17.5124	20.4529	21.0595	32.0741	7.72299	26.605	17.9088	23.28	41.9816	17.2209	7.71903	6.51226	11.432	12.0819	24.1493	24.209	6.00578	9.73725	8.805	24.7888	20.4233	42.8185	9.25751	15.9901	17.8181	25.1532	35.6616	27.9437	8.5729	6.17765	25.0377	18.2595	17.2153	35.1959	6.30995	12.0496	22.0744	12.2473	25.1254	18.7067	6.04521	8.69377
					s.03	4.42381	6.7929	8.93651	7.98337	13.6954	11.6556	6.20576	9.06053	7.78535	25.0666	51.2455	11.0778	3.22547	7.82479	8.36806	12.9532	15.2798	15.7005	9.00409	6.83231	9.70665	11.3022	53.9465	27.1035	4.97039	7.11091	7.35047	11.9252	17.0196	15.9675	8.71695	5.28974	10.0848	14.4373	19.613	20.5326	5.41704	9.0481	8.12301	9.67528	16.2802	15.9393	7.05935	8.83895
					s.04	8.26231	6.83716	9.41018	10.1521	16.3919	26.71	3.55021	5.90173	8.90758	76.7663	14.3661	46.3318	7.25047	14.0905	10.8175	9.76212	18.8096	31.0622	12.8843	10.2747	13.1092	12.9356	51.9063	24.4178	9.99568	19.4733	15.2822	22.6043	16.2769	26.9124	10.7651	11.9002	12.6764	20.654	24.5234	29.7573	21.2458	11.0601	10.6795	11.9464	18.9935	21.2397	12.8893	11.0072
					s.05	5.28259	6.61608	6.36071	8.00708	11.5733	37.0804	4.9603	21.7311	41.3648	32.1851	36.7114	51.9524	7.3387	10.7144	12.0753	8.4995	17.7213	31.2367	15.7261	15.6702	22.5383	41.3718	36.6073	81.2844	12.0516	12.1395	15.4861	20.0923	16.633	29.7405	23.8196	16.0129	15.7477	29.7713	28.2672	43.5962	8.51995	11.3945	15.6529	11.3442	18.197	23.4147	7.79295	11.5873
					s.06	5.3943	5.78076	5.27165	9.39671	18.7489	26.1273	6.35336	7.72866	10.1411	40.0028	36.6294	25.7616	9.52697	5.19166	7.94822	13.3314	10.8281	22.1206	20.3237	8.47693	28.0002	32.2903	44.5652	67.1881	14.1266	8.55219	13.7297	11.2789	12.6868	22.1343	12.8288	7.22066	24.7671	18.2001	27.0459	30.6897	9.60705	7.27591	9.34553	10.0227	13.5345	22.3141	13.6195	8.11241
					s.07	4.62874	9.54841	10.0293	15.5166	26.44	35.982	24.7726	29.2389	45.7461	14.3163	73.6187	66.022	6.55954	8.39442	15.3826	13.4919	28.4662	44.147	18.5187	31.0799	43.5175	26.449	25.1818	80.2414	10.7129	9.39148	18.0115	18.0596	37.4195	45.2385	7.99543	15.7428	32.4491	21.4493	38.2511	33.3746	7.8939	14.4403	13.7727	16.485	34.2586	35.5823	20.3544	17.821
					s.08	5.74	5.09561	4.20713	7.10386	7.99567	10.4902	6.57595	10.7831	13.3368	28.0793	39.0851	24.5215	6.47139	5.52086	4.28083	11.153	13.236	12.8408	11.0819	14.091	14.6181	21.0074	35.4922	32.0568	8.85268	10.912	14.3843	12.3111	16.5652	20.7463	10.3854	13.3262	11.4558	17.9351	28.2939	29.5002	12.3919	9.83464	12.3465	17.8802	16.6712	19.3066	9.60238	10.9625
					s.09	4.72744	6.81138	5.57402	10.3411	18.1983	22.0163	8.99947	9.26731	10.3062	82.8223	22.3943	90.2976	8.47948	10.0593	26.5463	13.4871	17.9222	28.563	11.2289	13.8097	12.133	17.2452	39.9503	53.9356	11.7761	9.4059	19.9831	24.4867	18.5285	31.8501	7.53786	9.34641	13.3725	12.6369	24.6198	29.4361	11.5849	7.62319	18.0345	19.0343	29.8533	37.1264	11.4512	13.3853
					s.10	3.74738	7.30302	8.36422	16.7613	21.1118	29.8046	7.09334	32.1169	10.2676	61.8428	28.1089	18.5189	9.18013	9.18353	10.126	23.9539	34.0571	30.288	11.0044	10.4963	37.0338	29.27	46.6417	21.5156	12.6783	10.8272	14.6877	20.1715	27.3873	46.0216	8.80864	11.2925	19.3906	34.6439	30.4377	27.2534	13.0813	15.3834	14.7075	15.2882	31.2055	31.2578	13.7858	13.0674
				% Recurrence		Inedx												Middle												Left												Right
				Additional Analysis in 4f Condition		in						an						in						an						in						an						in						an
						f1	f2	f3	f4	f5	f6	f1	f2	f3	f4	f5	f6	f1	f2	f3	f4	f5	f6	f1	f2	f3	f4	f5	f6	f1	f2	f3	f4	f5	f6	f1	f2	f3	f4	f5	f6	f1	f2	f3	f4	f5	f6	f1	f2
					s.01	5.32115	5.5232	4.11183	3.54882	4.90303	3.90804	3.88169	4.384	3.79184	4.19611	2.8984	2.53077	4.75343	4.6704	4.56553	3.93324	3.35527	3.11551	3.09393	3.4352	4.46037	4.13958	3.67494	2.28702	4.15379	4.0016	3.05571	2.76019	3.41254	2.35894	3.14768	3.5968	4.23803	3.67319	2.84378	2.42021	5.24221	5.3088	4.77886	3.96998	3.90538	2.9983	3.97743	3.832
					s.02	5.97622	5.3504	4.70675	4.5876	4.36624	3.29266	4.17059	4.7648	5.14392	3.611	3.53109	3.28467	6.05516	6.5408	5.17397	4.40528	3.94667	3.25404	5.94262	7.2528	6.21357	4.55085	4.5434	4.14513	4.54011	4.496	4.80139	2.94251	2.18312	2.95567	3.93207	5.5584	4.68722	3.38346	3.79083	3.54707	5.14983	5.3456	4.18995	6.24117	3.49646	4.36358	4.9953	6.3136
					s.03	6.8446	8.1136	6.65074	6.20018	5.97927	5.94997	5.23717	7.6272	5.26411	5.30414	3.37658	5.00426	4.35703	5.9104	6.77543	5.85533	5.21605	5.32127	3.45169	5.5984	6.65224	5.38046	3.63498	5.63695	4.7064	6.168	5.90409	5.22217	4.68325	4.72188	3.33916	6.0992	5.34373	5.05116	3.67761	4.88705	5.44041	7.5808	6.70933	6.40228	5.91534	5.86073	5.76962	7.5328
					s.04	5.90735	6.7392	4.76985	4.8533	4.83244	4.10784	3.86321	6.52	5.82447	4.57064	4.38223	3.3273	6.37094	5.9088	5.69677	5.42993	4.34626	5.06287	3.8061	5.36	4.65717	4.83634	3.4232	2.72124	4.68288	4.432	4.58656	4.1636	3.60302	3.42986	3.9304	5.8192	5.26411	4.57064	2.66663	2.75587	4.01942	5.0928	4.63764	3.54599	3.4565	4.24636	3.31732	4.3328
					s.05	5.3581	7.5744	5.93865	6.48567	5.38521	3.77484	3.05697	4.6784	3.59053	3.3665	4.2064	2.39357	1.7334	5.5824	4.82243	5.71683	4.5061	3.63765	0.388001	0.8176	2.0146	3.29301	4.20907	2.66796	2.89237	6.368	5.21303	5.48222	4.41686	3.29266	2.30953	3.5712	3.91052	3.61807	3.89339	2.50147	3.0049	4.8128	4.03972	5.56843	3.05823	3.26736	1.4529	1.3888
					s.06	2.37335	2.2208	2.92801	3.35378	3.50578	3.60568	2.10965	2.8976	1.90193	2.03516	2.2031	3.39389	1.2799	1.3136	1.69611	1.69738	2.65065	3.56172	0.414875	0.5568	0.530317	2.52841	2.23773	3.2234	1.19759	1.9536	1.71564	2.39132	2.70393	3.11418	0.665144	1.9488	1.03509	2.43372	2.24173	3.38191	0.849906	2.016	2.36765	2.65702	1.84746	2.98897	0.381282	2.2064
					s.07	6.26176	5.6832	5.36476	3.22941	2.70792	1.83281	5.53951	4.2592	3.93756	3.80462	3.13949	1.72891	5.56302	5.9936	4.51145	3.98553	2.86243	1.90873	3.87161	4.9792	4.48891	3.59687	3.90937	1.19213	4.11348	4.7008	3.88198	3.23789	2.25372	1.87676	4.7803	4.9968	3.58452	3.22799	2.93036	1.5118	4.06981	5.7952	5.42485	3.68308	2.30966	1.4452	5.18174	4.2224
					s.08	6.77237	5.88	6.93468	4.61162	4.65528	5.22537	5.40681	3.2096	4.86149	1.94612	1.68496	3.09153	6.39277	6.88	5.60213	4.45475	4.99361	5.05488	3.94047	5.0592	5.59311	2.91848	2.65864	4.25702	5.12295	5.072	4.86149	3.2605	2.8571	4.32095	3.68852	3.6816	5.10636	2.52417	1.98332	3.36725	6.0434	6.7552	6.5576	5.02996	4.82844	5.14545	5.99133	4.664
					s.09	8.37141	7.4928	6.41788	4.95223	3.12217	2.13783	5.78641	6.2336	5.3918	5.14444	2.84911	2.81448	7.72138	7.0144	5.82297	4.83069	3.91736	2.49747	6.87987	6.6224	5.42936	4.60173	2.61602	2.98231	7.47951	7.1808	5.43537	3.77918	2.90106	2.46151	8.02036	6.424	6.01076	5.61648	3.00495	3.36059	6.58593	5.416	4.65867	2.86619	1.88742	1.82482	5.18846	6.1856
					s.10	8.61831	8.3344	6.98275	5.58681	3.95599	3.02094	5.06752	6.0928	5.86804	4.57488	2.52011	3.1275	6.87315	6.5808	6.33976	5.10063	3.71091	2.70126	4.70136	5.6928	5.39481	5.36774	3.14481	3.13815	5.02217	6.8112	6.22108	4.59042	3.3273	2.27769	5.15318	6.8816	5.7163	4.23003	1.91406	2.47483	6.34238	5.8064	6.42239	3.77777	3.4525	2.81715	4.64761	4.4864
				Average Line		Inedx												Middle												Left												Right
				Additional Analysis in 4f Condition		in						an						in						an						in						an						in						an
						f1	f2	f3	f4	f5	f6	f1	f2	f3	f4	f5	f6	f1	f2	f3	f4	f5	f6	f1	f2	f3	f4	f5	f6	f1	f2	f3	f4	f5	f6	f1	f2	f3	f4	f5	f6	f1	f2	f3	f4	f5	f6	f1	f2
					s.01	4.68229	5.24662	5.56838	5.68495	7.40972	6.2603	3.66075	3.92348	4.72445	4.86409	6.12583	4.76157	3.79459	3.98648	4.60879	5.12091	6.6542	5.42623	3.15131	3.30323	4.41388	4.32265	6.92332	4.98723	3.71111	4.45301	4.02824	4.17064	5.86453	4.73711	3.42845	3.61411	4.38027	4.41524	5.63383	4.64645	4.10797	4.30914	4.58849	4.86499	6.78817	4.72544	3.44356	4.10224
					s.02	3.42157	3.99237	5.25178	4.98969	7.60376	5.10226	3.91122	3.79839	4.85763	4.76179	5.95278	5.19188	4.59831	4.48936	4.74594	5.11757	5.73552	4.73711	4.33923	5.02929	5.36326	4.94045	6.23545	5.95562	3.45391	3.39155	4.14098	4.13414	3.82697	4.41498	3.26609	3.77146	4.3276	4.72215	6.37008	5.24331	4.06763	4.24388	4.60731	6.73459	4.87158	5.36743	3.86095	4.54878
					s.03	4.50729	4.89362	5.21814	6.5503	8.79686	7.99445	4.26284	4.42267	4.39451	5.07205	6.02151	6.98694	3.41332	3.929	4.55397	6.11363	6.98462	5.82465	3.49163	3.75667	4.27863	5.22967	5.78875	7.29784	3.2434	4.19225	4.1171	5.14182	6.25254	5.11884	3.01518	3.9665	4.27116	5.02136	6.25868	6.58003	3.88879	5.07934	4.90502	6.30321	8.23473	6.90067	4.53027	4.47993
					s.04	4.57587	4.41022	4.43071	5.08419	7.83127	5.98866	3.96352	4.14409	4.69441	5.45806	6.82546	5.8038	4.59567	4.47835	4.34594	5.73219	6.8529	5.88247	3.55316	4.23958	3.88993	4.80838	5.55865	4.61752	3.69406	3.77784	3.88027	4.14494	5.09202	5.17519	3.24348	3.99913	4.54232	4.83646	4.59411	4.6669	3.70135	3.70673	3.91135	3.70973	5.04079	4.69589	3.30124	3.46813
					s.05	5.08935	4.49465	5.21899	6.41023	7.98762	6.40245	3.40819	4.59462	4.30139	5.63455	7.1087	4.77384	3.55705	4.12795	4.22472	5.93816	7.43493	5.86546	2.45486	2.74612	3.35278	5.1305	7.15279	5.05355	3.5823	3.96539	4.46839	5.1714	6.86252	6.17761	3.25115	3.65976	3.95972	4.93811	6.41285	4.45093	3.32319	3.39522	3.7289	5.24892	5.17383	4.89205	2.84926	3.0599
					s.06	4.76764	3.84148	4.22956	4.41288	7.50456	5.61736	4.03608	3.48007	3.36741	3.64185	5.59238	5.20702	3.56463	3.28669	3.6394	4.34902	5.91511	5.91892	2.10144	2.99593	2.27547	4.45736	5.49942	4.85632	3.15061	3.56328	3.04984	4.28812	5.64197	4.79771	2.59082	3.13629	2.59527	4.62554	5.22968	4.69008	2.50517	3.72133	3.47886	4.02778	3.74679	4.7476	2.71858	3.24148
					s.07	4.47544	3.98799	4.63855	4.65611	5.39849	4.68792	3.71055	3.73797	3.9692	4.74968	5.78962	3.82435	4.3851	4.06664	4.54333	4.72091	5.23213	4.15249	3.36888	3.71579	4.69166	5.27661	6.82974	3.87084	3.60883	4.15318	4.48674	4.27586	4.79384	4.33153	3.25067	3.55938	4.02946	3.8383	5.66568	4.11432	3.26583	4.04703	3.98408	4.54711	4.3378	4.40819	3.57067	3.9846
					s.08	4.81539	4.49365	5.0184	4.30986	6.34949	6.18121	3.91969	2.69146	3.74457	2.42625	2.7773	4.83896	4.28878	4.57979	4.3856	5.57919	7.03785	6.79399	3.42174	3.47557	3.99464	2.87679	4.33024	6.09751	3.35884	3.9662	3.82203	3.85167	4.20463	5.35663	3.71977	2.77576	3.80212	2.65067	3.48569	5.22854	4.06661	4.78061	4.85692	5.77571	7.49778	6.44001	4.02105	3.19254
					s.09	4.59882	5.05688	5.22024	5.28212	5.84112	4.45896	3.48834	4.05539	4.52153	5.05643	5.22854	4.60628	4.49414	5.31076	5.08132	4.42656	5.74186	4.23746	3.84865	4.6075	4.2544	4.45052	5.10322	4.47367	4.40371	4.5971	4.45122	3.9835	4.97725	4.48801	4.3271	4.84556	4.42055	4.96312	5.24564	4.76894	3.68637	4.1304	4.31364	2.90136	4.02409	4.16714	3.62964	3.98474
					s.10	4.56781	4.49234	4.63854	5.47583	6.56843	5.10607	3.55879	3.46252	4.92863	5.23575	5.24463	4.80828	4.62439	4.05113	4.04095	5.28761	5.92741	4.75226	2.97503	3.0437	4.56148	5.20663	5.21289	5.02214	3.28323	3.83329	4.3368	4.20627	5.30703	4.37497	3.35672	3.69444	4.51777	5.19721	4.42627	4.0127	4.32353	3.6031	4.21917	3.60947	6.03778	4.82801	3.29155	2.81826
[truncated: 4 more columns]
